# Supplementary material
Source: PubMed Central journal article supplement (PMC4060654)

A

Buxeda &amp; Moore 2000

Caldwell 2007

Chambers 2008

Chaplin 2009

Hoffman 2001

Marrs &amp; Novak 2004

Preszler 2009

Biology

Odds Ratio (log scale)

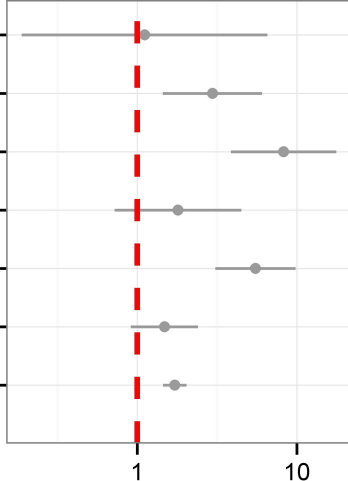

B

Becvar et al. 2008

Casanova 1971

Dougherty et al. 1995

Farrell et al. 1999

Gosser 2011a

Gosser 2011b

Gosser 2011c

Hagen et al. 2000

Paulson 1999

Quitadamo et al. 2009 a

Rogerson 2003

Shatila 2007

Tien et al. 2002

Williamson &amp; Rowe 2002

Chemistry

Odds Ratio (log scale)

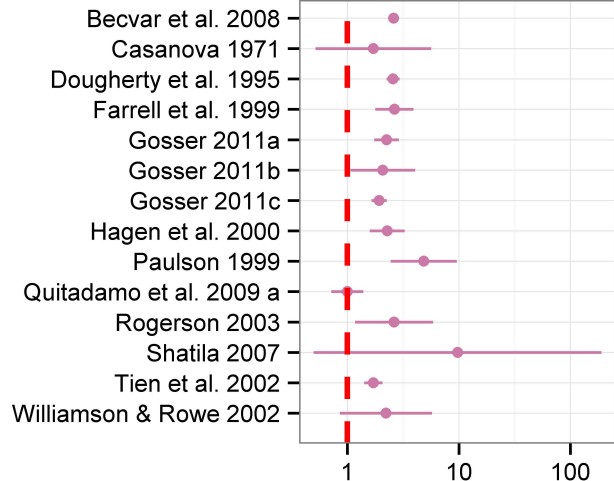

C

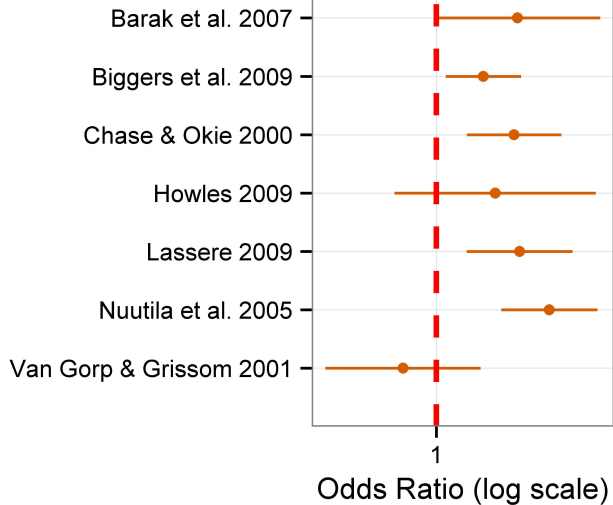

D

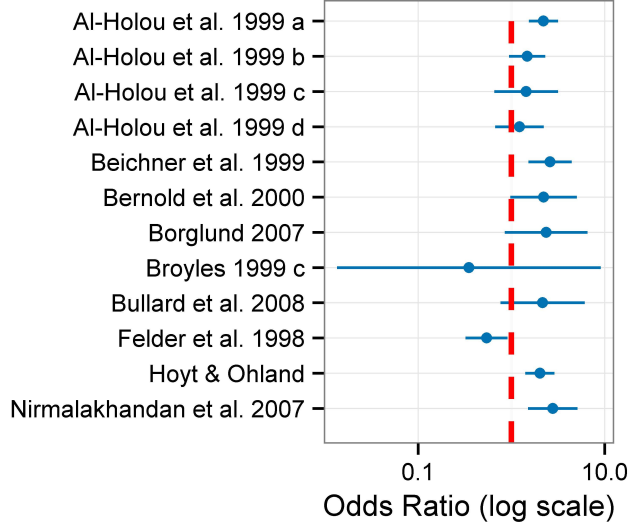

E

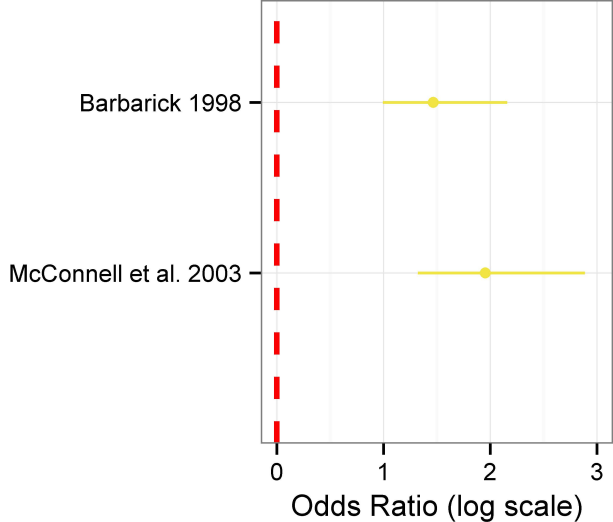

F

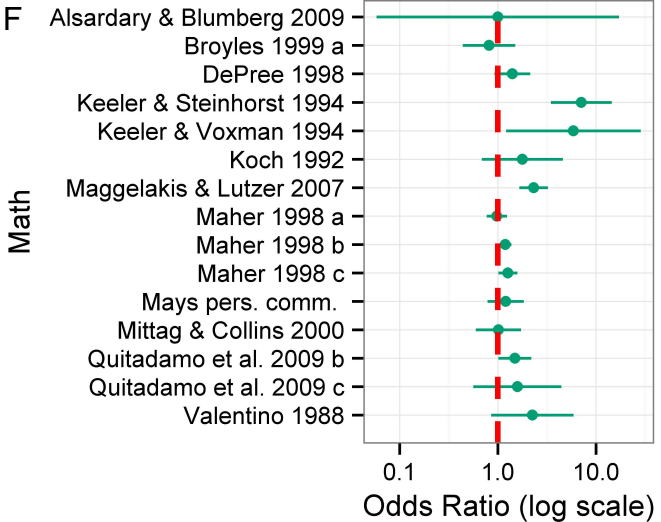

Physics  
G

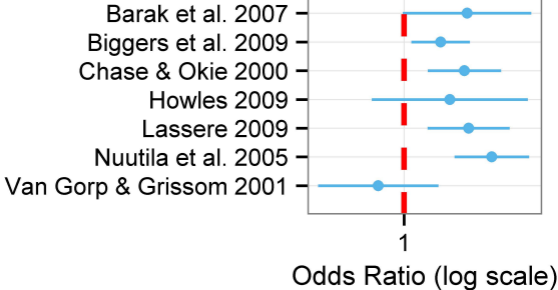

Supplement: 1319030111_pnas.1319030111.sfig03.pdf [file 1319030111_pnas.1319030111.sfig03.pdf]
