# Supplementary material
Source: PubMed Central journal article supplement (PMC4060654)

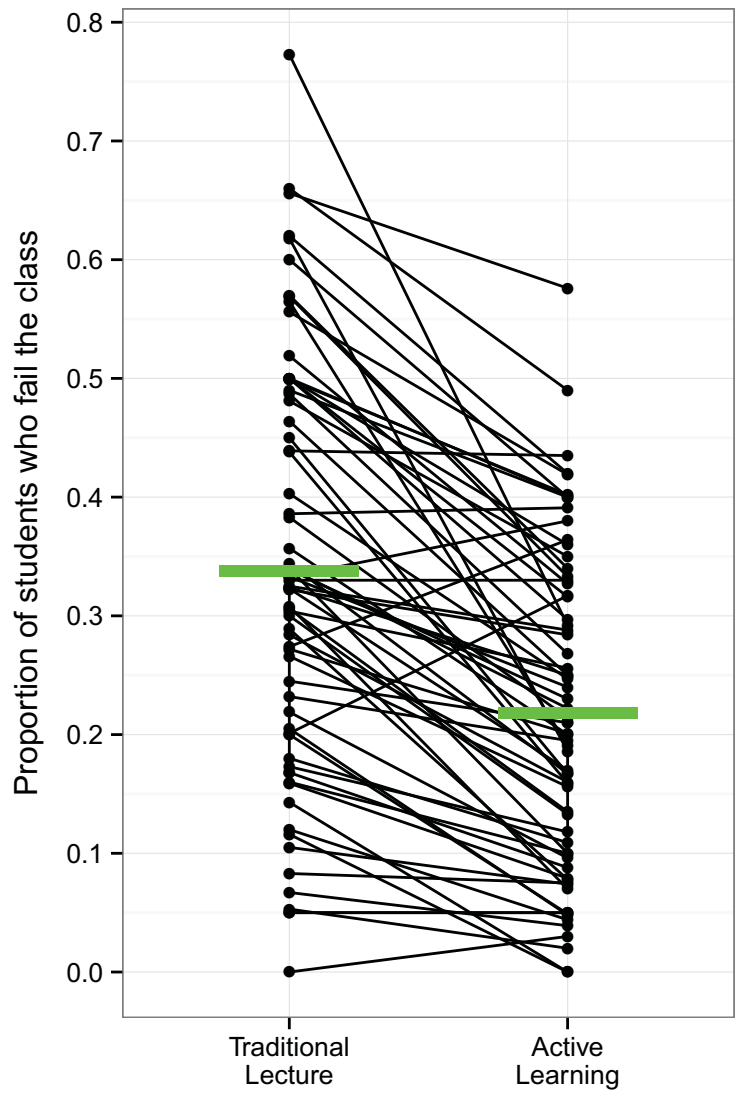

Supplement: 1319030111_pnas.1319030111.sfig01.pdf [file 1319030111_pnas.1319030111.sfig01.pdf]

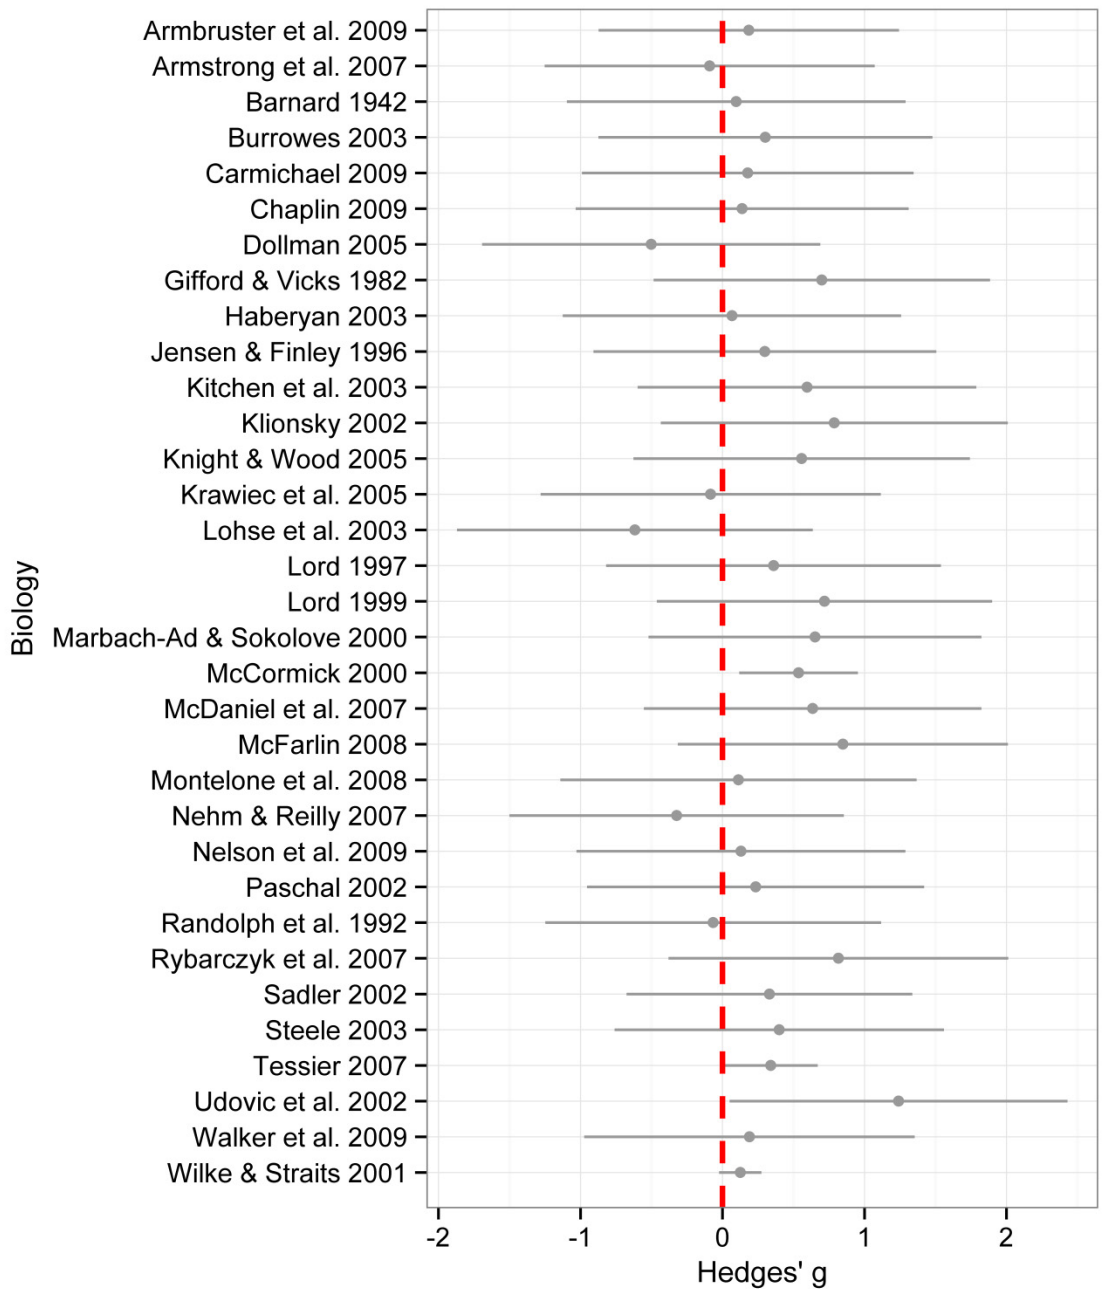

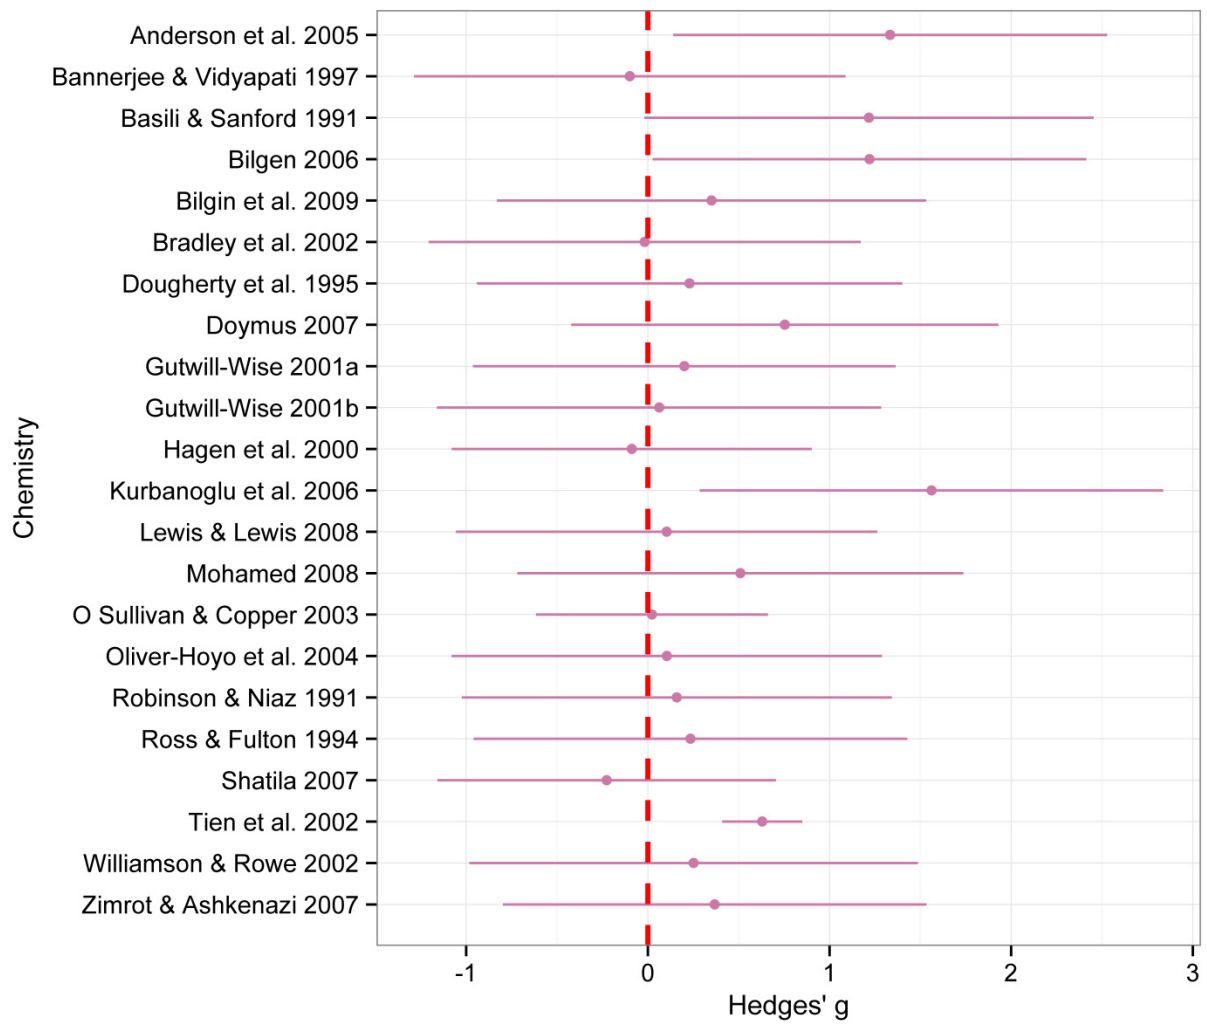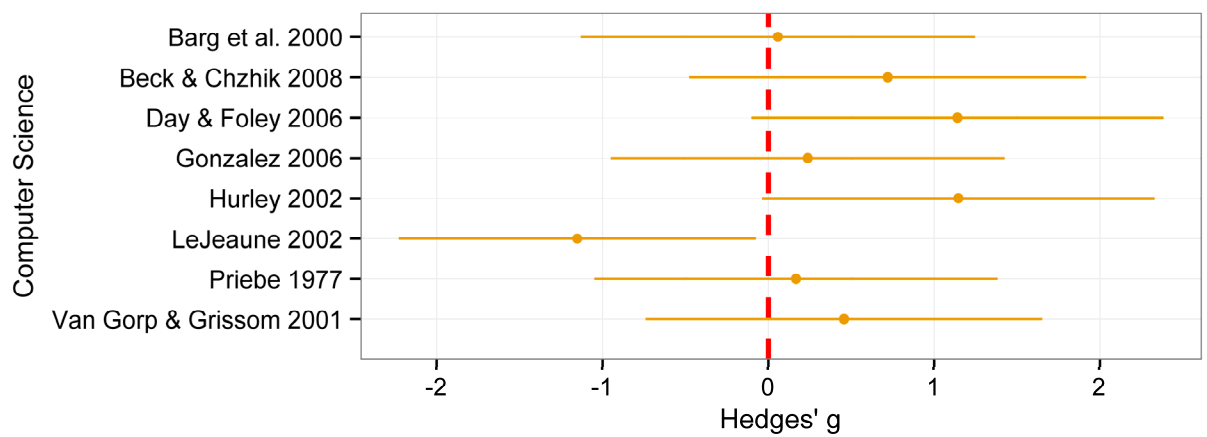

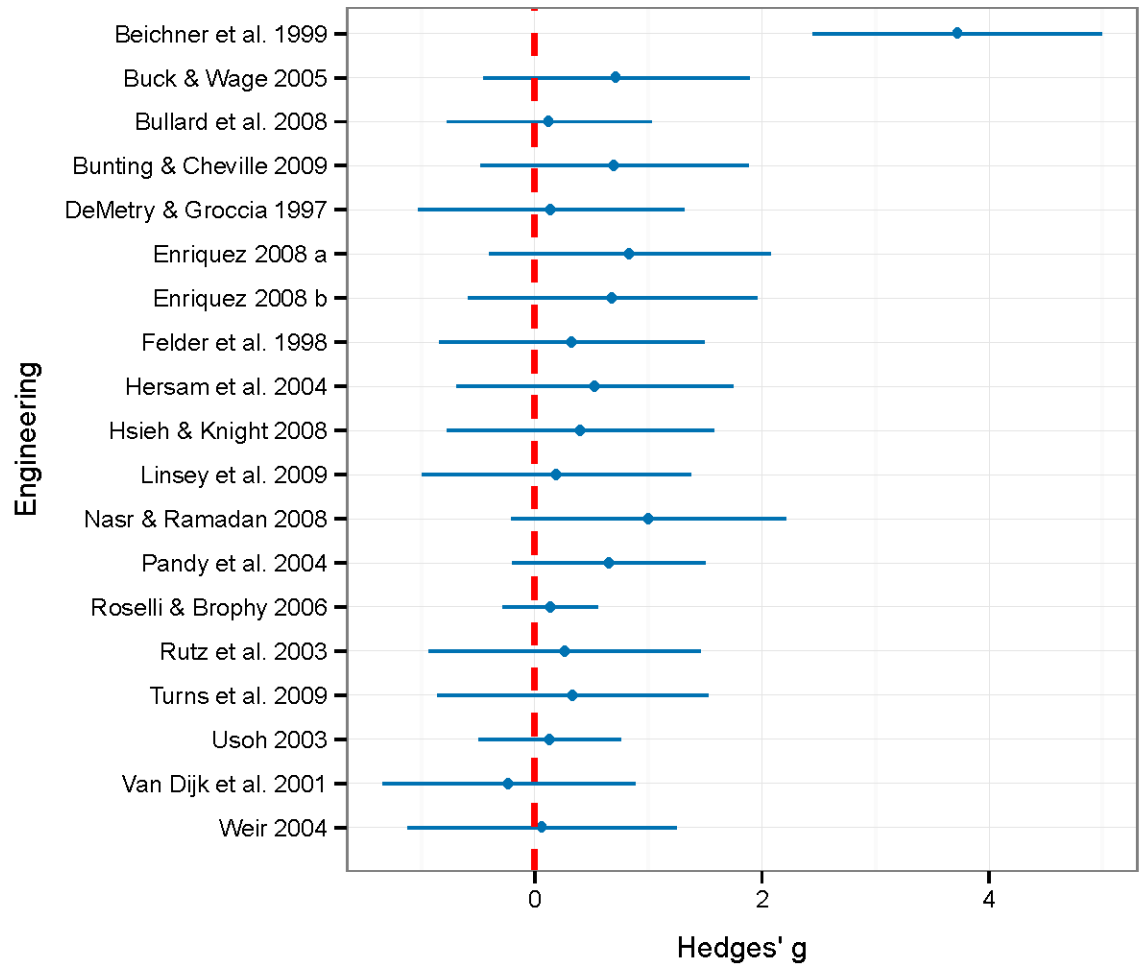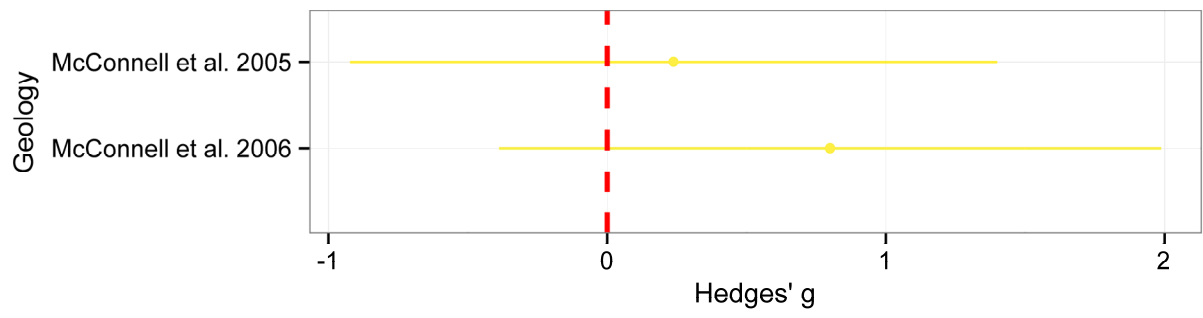

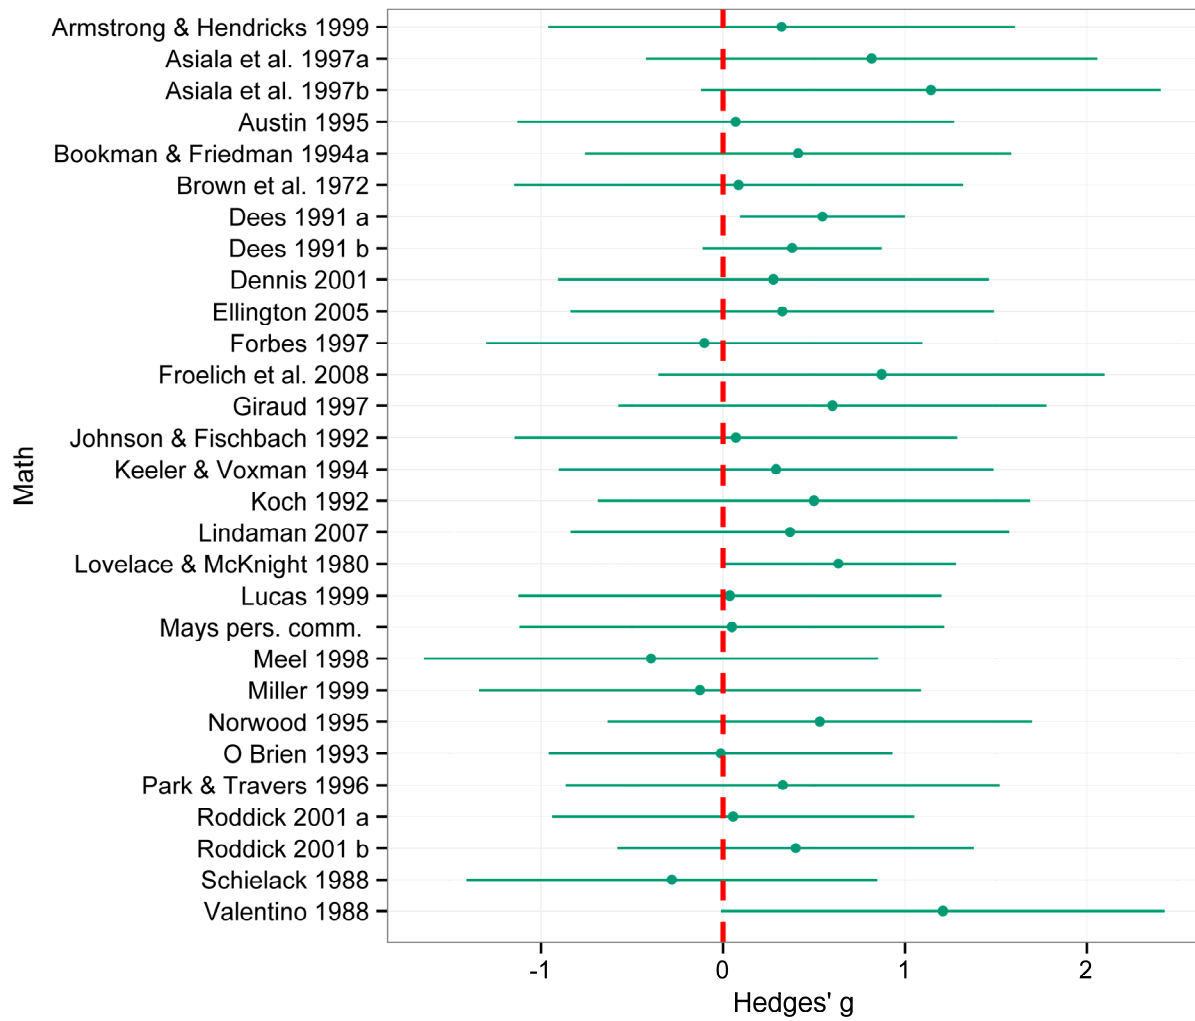

Physics

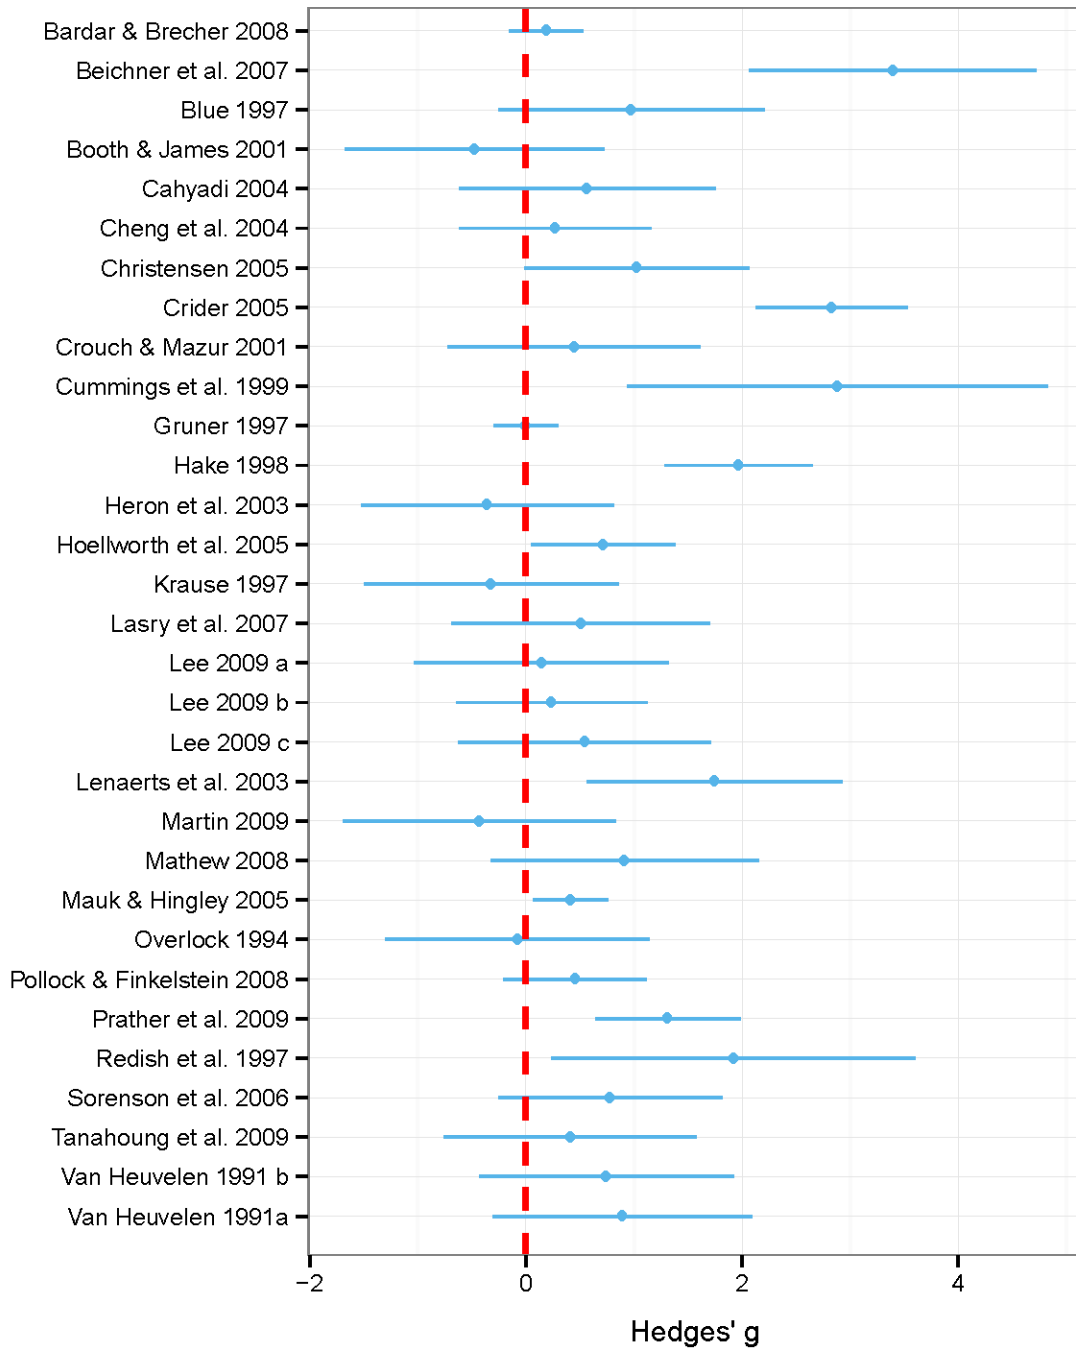

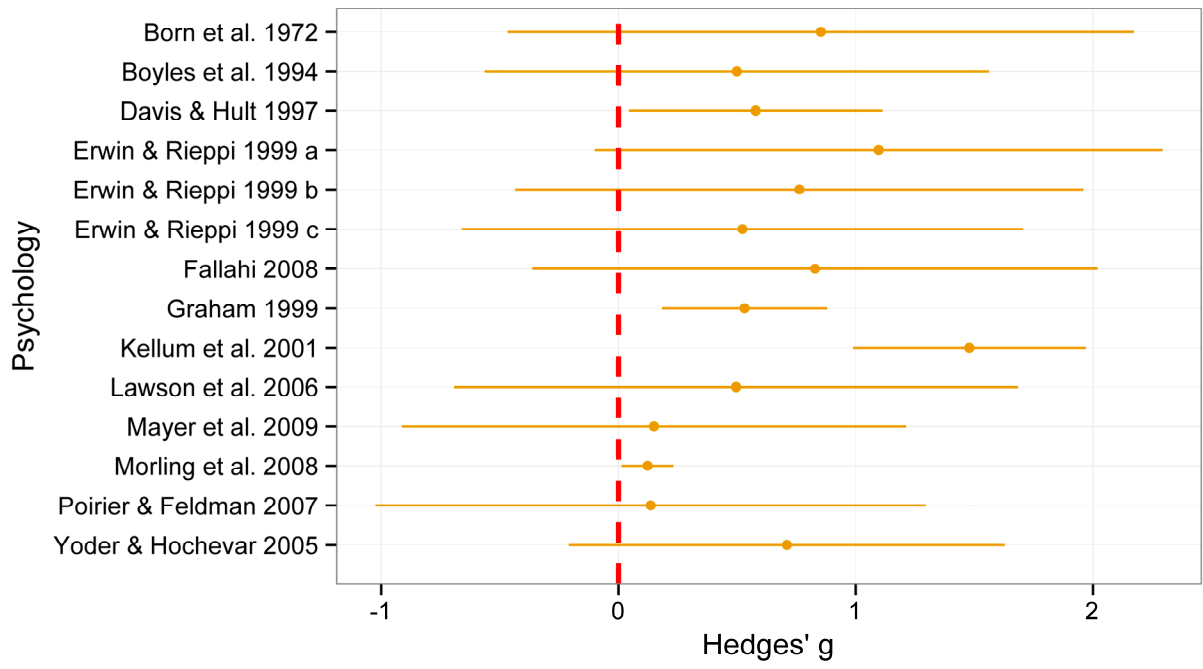

Supplement: 1319030111_pnas.1319030111.sfig02.pdf [file 1319030111_pnas.1319030111.sfig02.pdf]

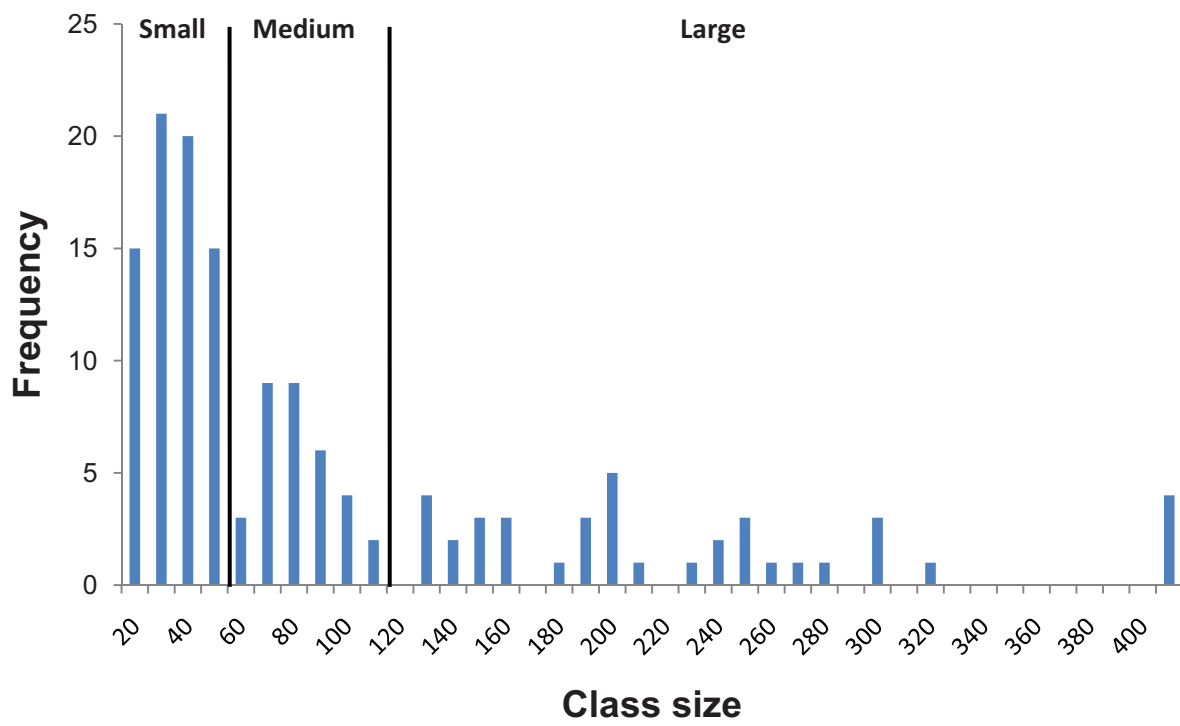

Supplement: 1319030111_pnas.1319030111.sfig04.pdf [file 1319030111_pnas.1319030111.sfig04.pdf]

A

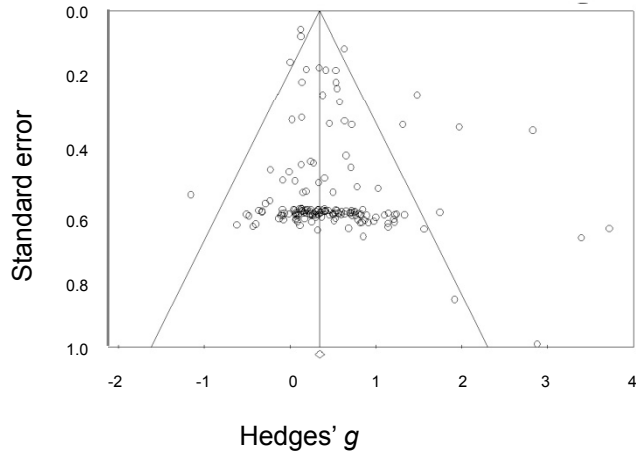

B

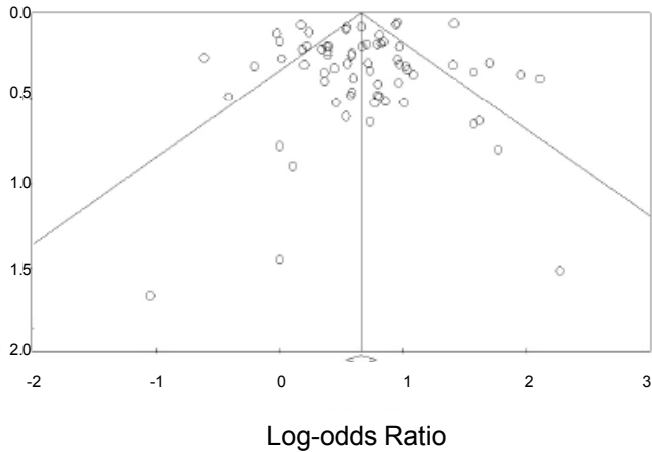

Supplement: 1319030111_pnas.1319030111.sfig05.pdf [file 1319030111_pnas.1319030111.sfig05.pdf]
